# Supplementary material for: Modulation of photocatalytic properties through counter-ion substitution: tuning the bandgaps of aromatic sulfonium octamolybdates for efficient photo-degradation of rhodamine B
Source: Royal Society of Chemistry journal article supplement (doi:10.1039/d1dt03609b), 2022-01-01
Supplement: d1dt03609b1.pdf [file d1dt03609b1.pdf]

## Supporting information

### **Modulation of Photocatalytic Properties through Counter-ion Substitution: Tuning the Bandgaps of Aromatic Sulfonium Octamolybdates for Efficient Photo-degradation of Rhodamine B**

Mahender Singh and Chullikkattil P. Pradeep\*

\*School of Basic Science, Indian Institute of Technology Mandi, Mandi – 175005, Himachal Pradesh, India.

Fax: +91 1905 267 009; Tel: +91 1905 267 045; E-mail: [pradeep@iitmandi.ac.in](mailto:pradeep@iitmandi.ac.in)

## Table of contents

| Sr. No. | Contents                                                                                                                          | Pages   |
|---------|-----------------------------------------------------------------------------------------------------------------------------------|---------|
| 1.      | <sup>1</sup> H, <sup>13</sup> C, and <sup>19</sup> F spectra of DMPST in DMSO-d <sub>6</sub> .                                    | S3      |
| 2.      | HR-MS of DMPST.                                                                                                                   | S4      |
| 3.      | FT-IR spectra of DMPST.                                                                                                           | S5      |
| 4.      | <sup>1</sup> H, <sup>13</sup> C, and <sup>19</sup> F spectra of CPDST in DMSO-d <sub>6</sub> .                                    | S6      |
| 5.      | HR-MS of CPDST.                                                                                                                   | S7      |
| 6.      | FT-IR spectra of CPDST.                                                                                                           | S8      |
| 7.      | The powder XRD patterns of hybrids <b>1-4</b> .                                                                                   | S9      |
| 8.      | XPS atomic percentage analysis of different Mo oxidation state in hybrids <b>1-4</b> .                                            | S10     |
| 9.      | <sup>1</sup> H, <sup>19</sup> F spectra of hybrids <b>1</b> and <b>2</b> in DMSO-d <sub>6</sub> .                                 | S11     |
| 10.     | <sup>1</sup> H, <sup>19</sup> F spectra of hybrids <b>3</b> and <b>4</b> in DMSO-d <sub>6</sub> .                                 | S12     |
| 11.     | ESI – MS (negative mode) data of hybrid <b>1</b> .                                                                                | S13     |
| 12.     | ESI – MS (negative mode) data of hybrid <b>3</b> .                                                                                | S14     |
| 13.     | ESI – MS (negative mode) data of hybrid <b>4</b> .                                                                                | S15     |
| 14.     | Table of crystallographic data and structure refinement parameters of hybrid <b>3</b> .                                           | S16     |
| 15.     | Properties of rhodamine B (RhB) dye.                                                                                              | S17     |
| 16.     | The control study of RhB degradation.                                                                                             | S18     |
| 17.     | The images of hybrid <b>4</b> powder before and after reduction.                                                                  | S19     |
| 18.     | The XPS analysis of recycled catalyst.                                                                                            | S20     |
| 19.     | The PXRD spectra of hybrid <b>4</b> fresh and recycled catalyst.                                                                  | S21     |
| 20.     | The comparison table of photocatalytic activity with reported octamolybdate based materials.                                      | S22     |
| 21.     | The zeta – potential and wavelength shift of RhB during photodegradation with different hybrid.                                   | S23     |
| 22.     | The zoom-in (positive mode) ESI-MS spectra of RhB degradation study.                                                              | S24-S25 |
| 23.     | Schematic for plausible pathways and fragments formed during RhB dye photodegradation using hybrid <b>4</b> .                     | S26     |
| 24.     | Table for various intermediates involved in RhB dye photodegradation their chemical composition, expected and observed m/z value. | S27     |

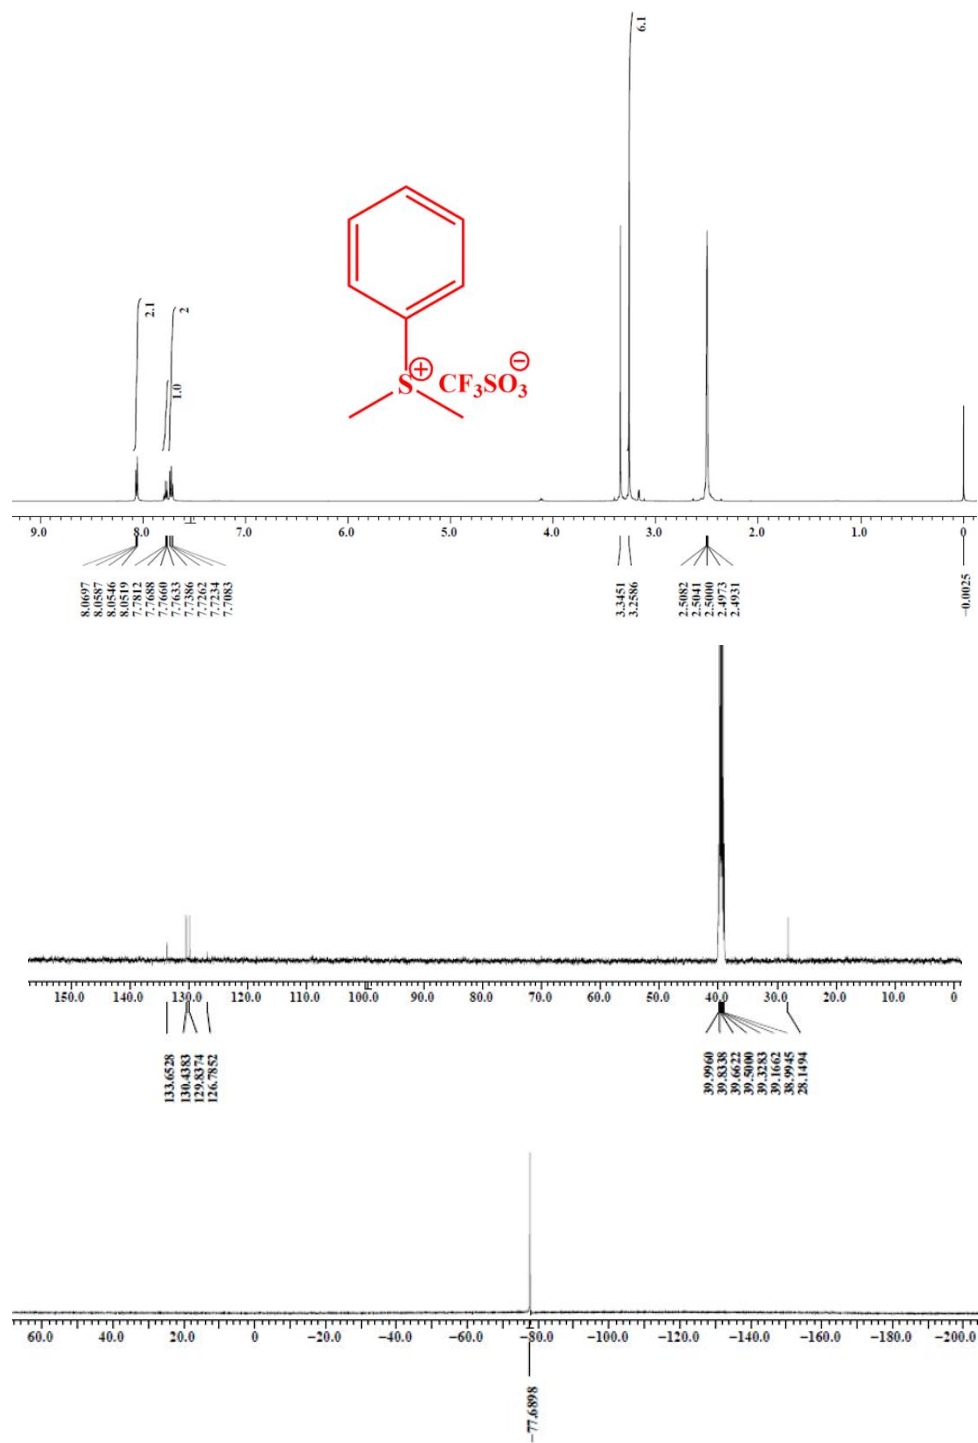

**Fig. S1** <sup>1</sup>H, <sup>13</sup>C, and <sup>19</sup>F NMR spectra of DMPST in DMSO-d<sub>6</sub>.

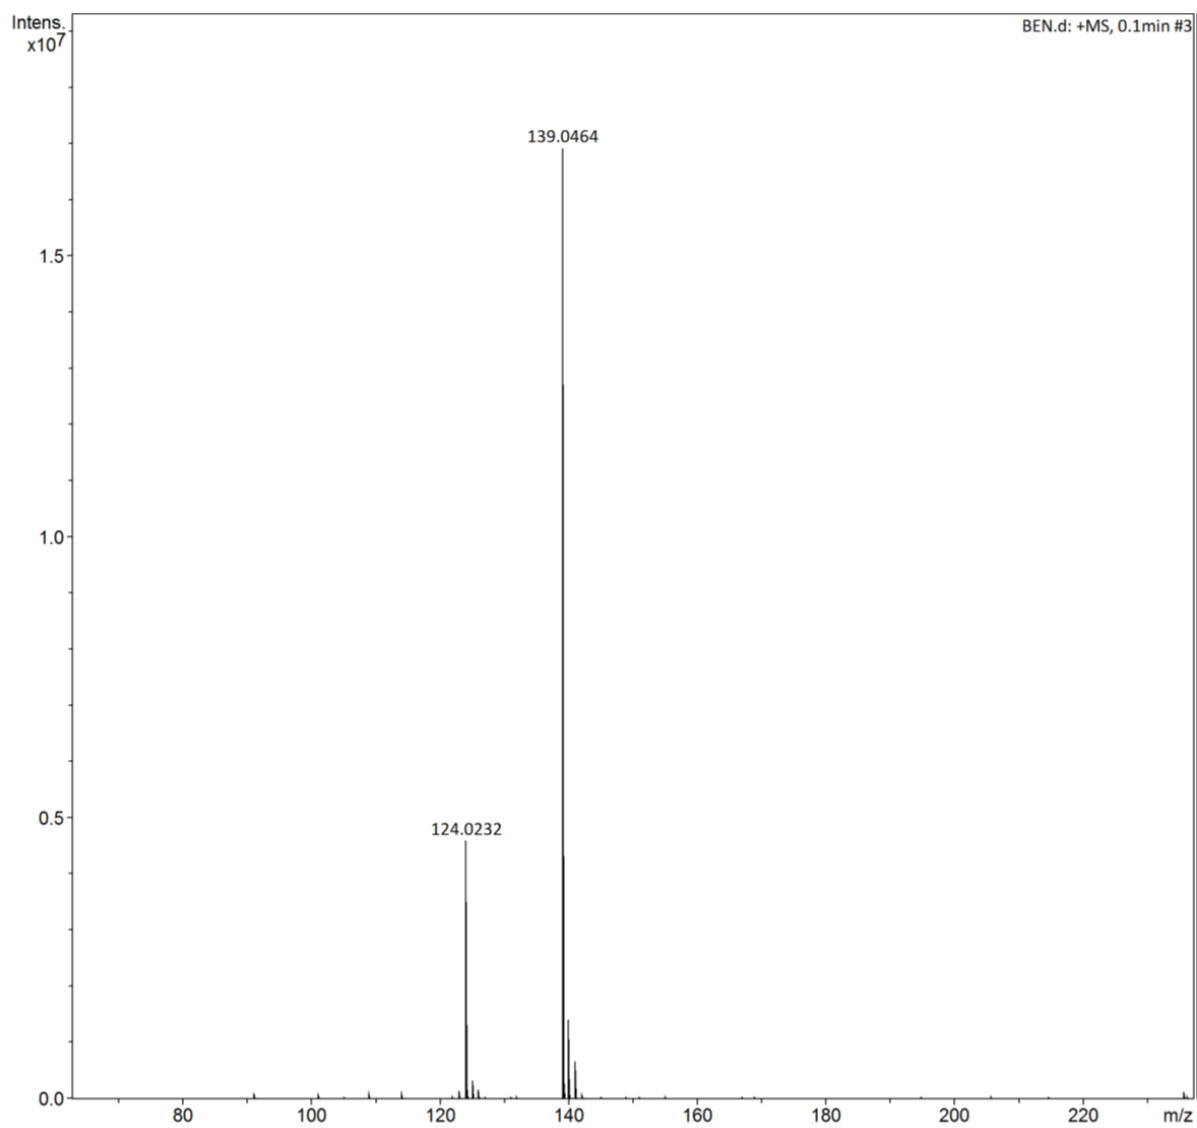

**Fig. S2** Mass spectrum of DMPST.

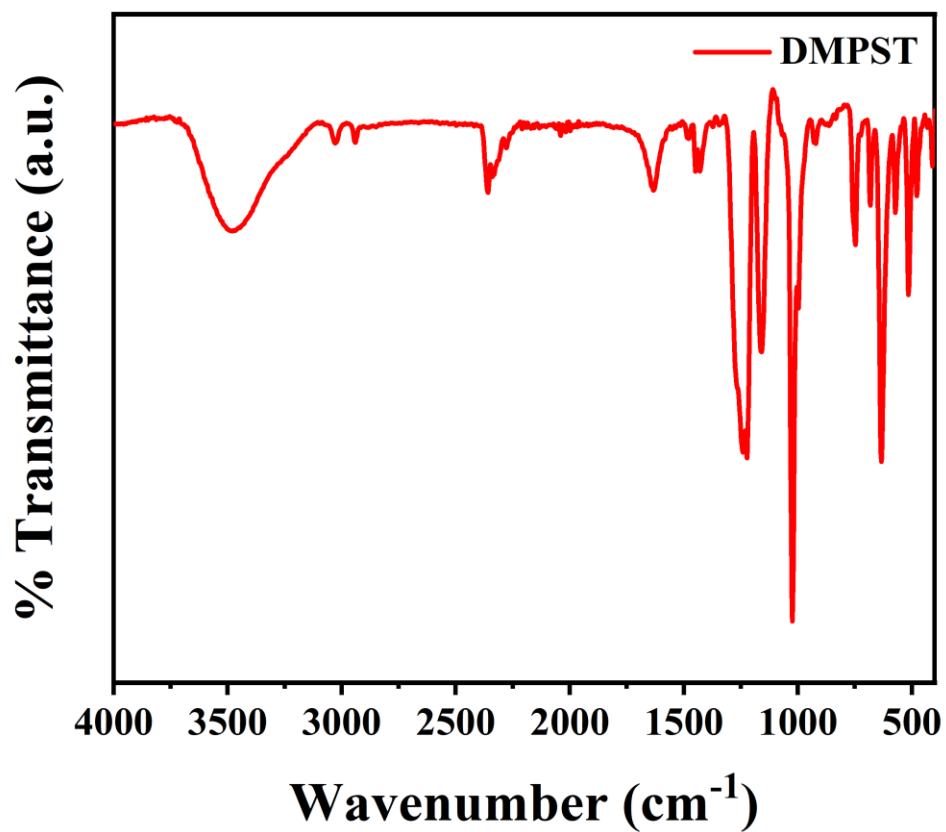

**Fig. S3** FT-IR spectrum of DMPST.

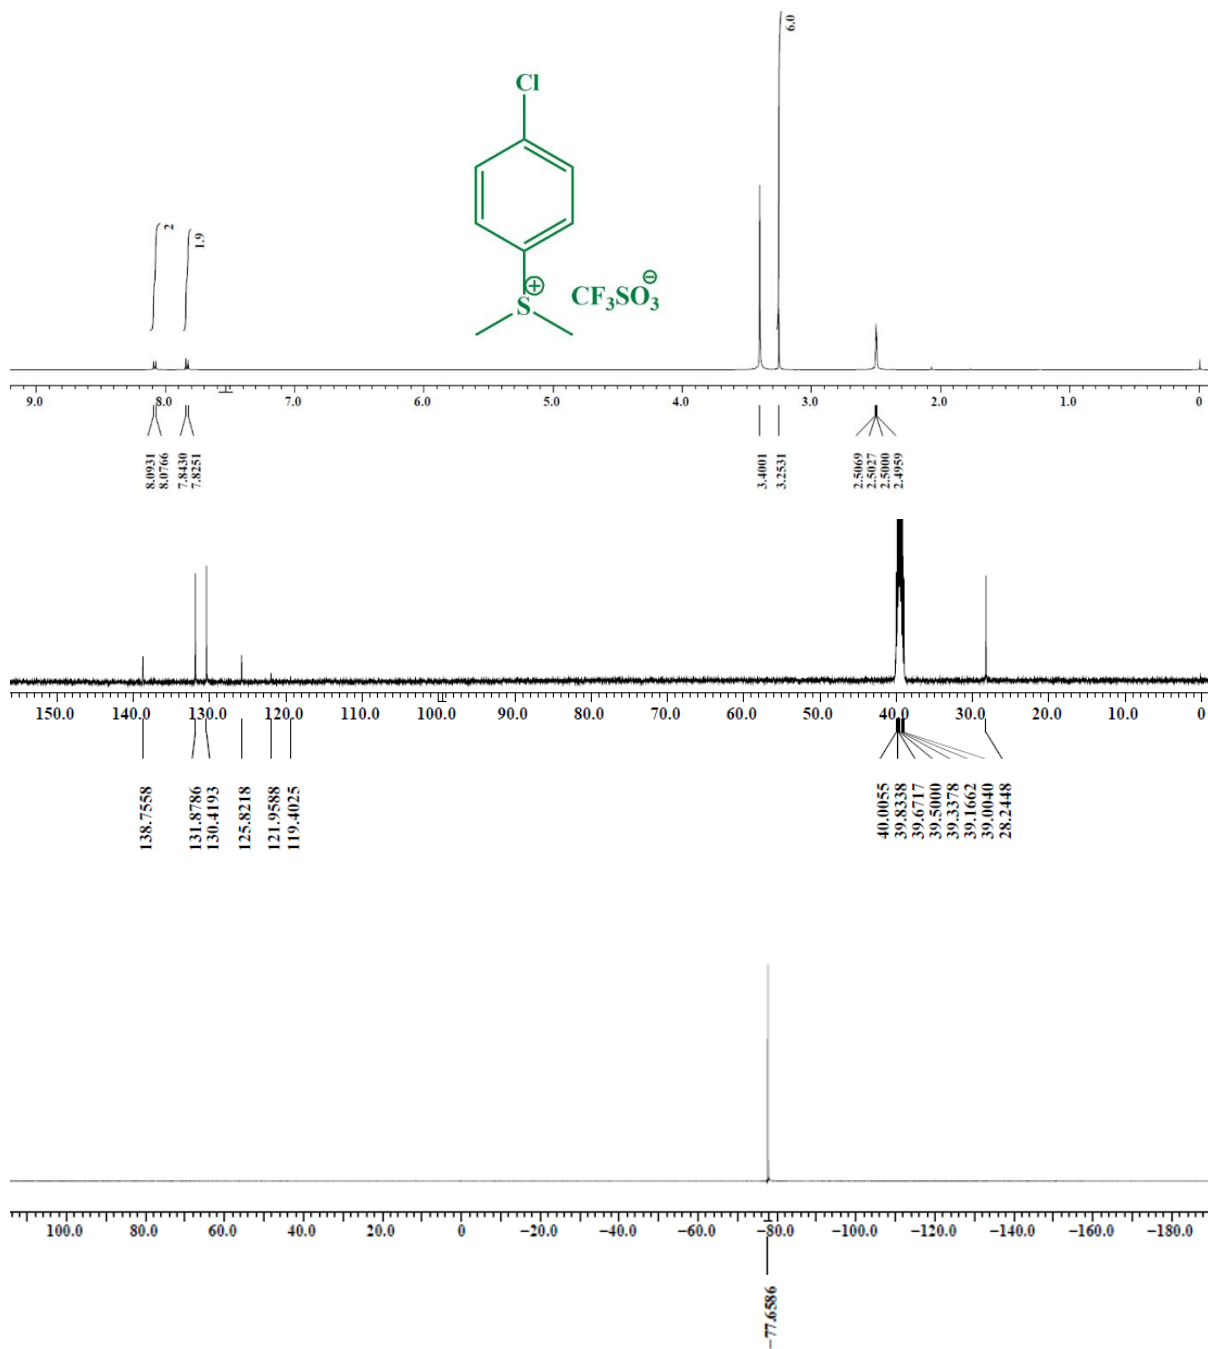

**Fig. S4** <sup>1</sup>H, <sup>13</sup>C, and <sup>19</sup>F NMR spectra of CPDST in DMSO-d<sub>6</sub>.

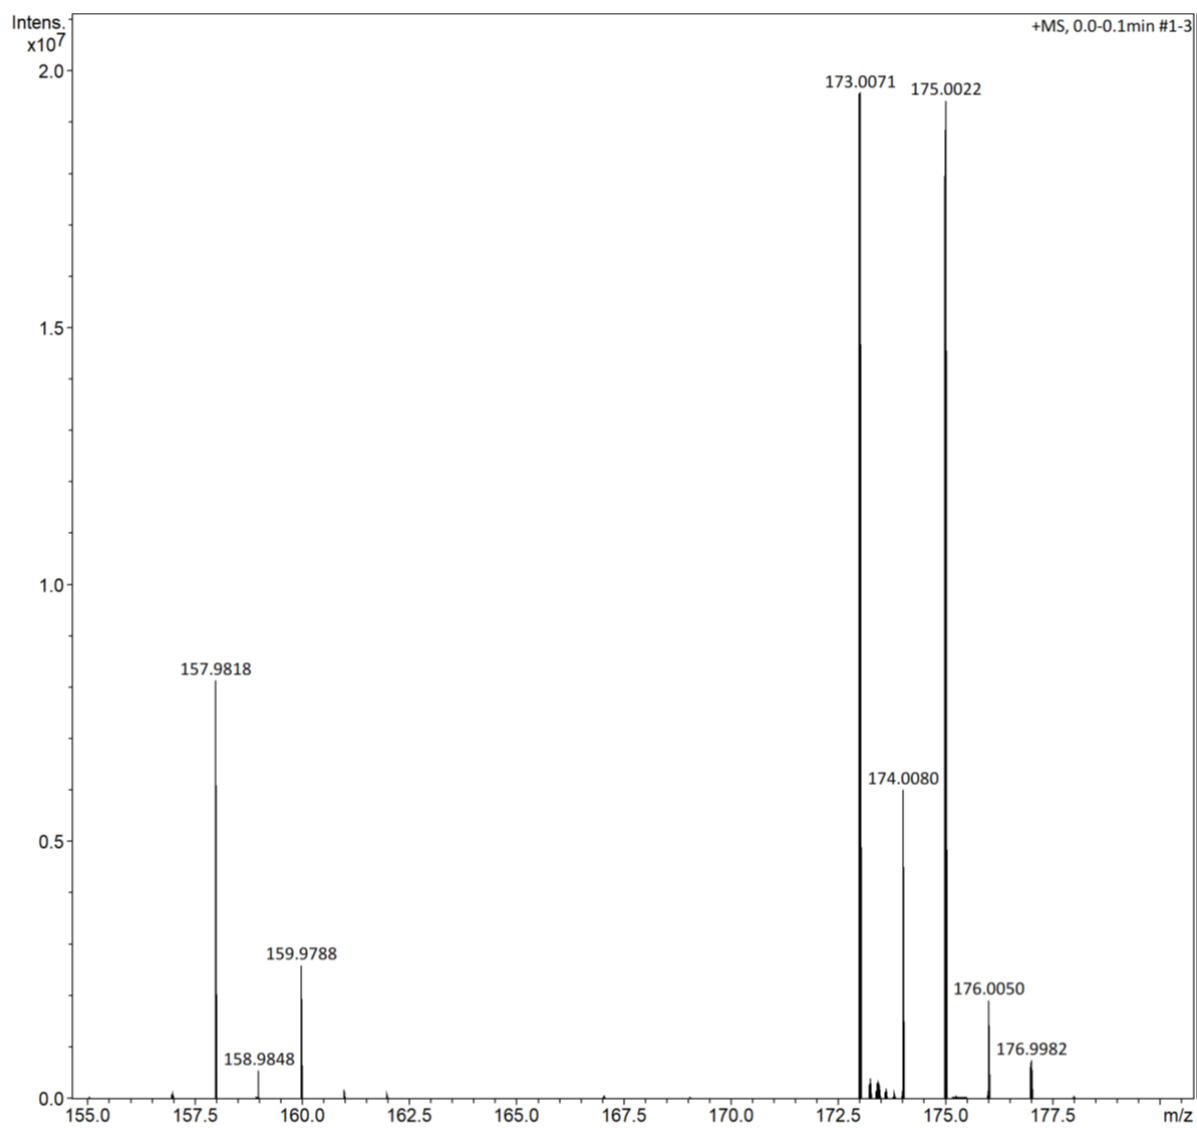

**Fig. S5** Mass spectrum of CPDST.

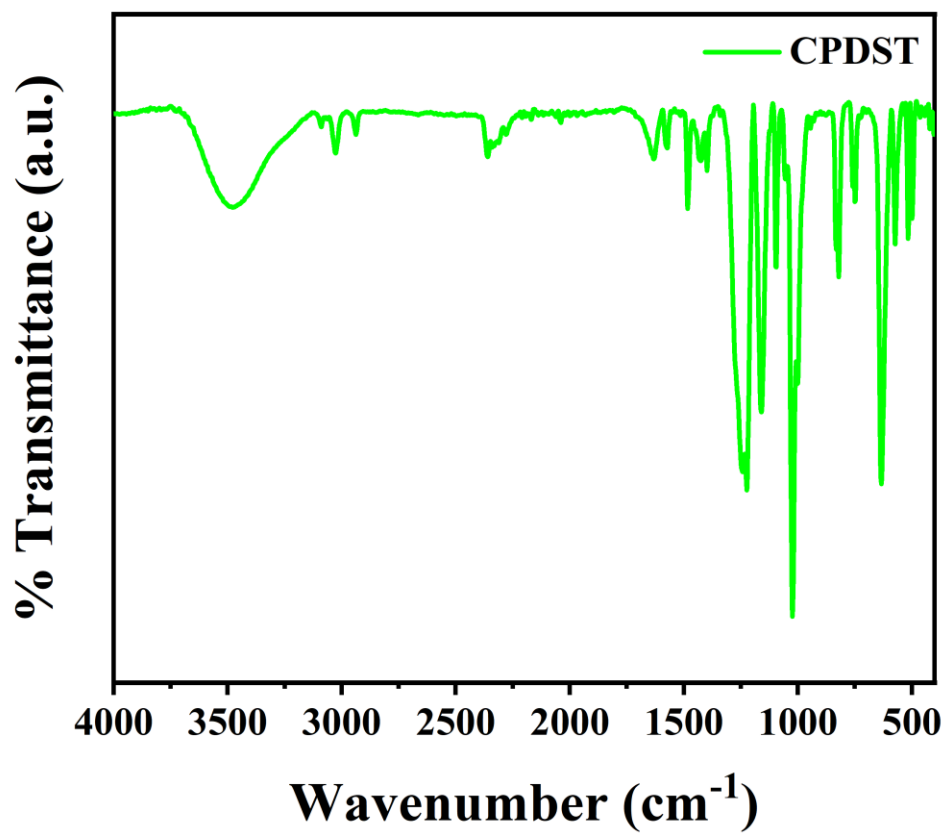

Fig. S6 FT-IR spectrum of CPDST.



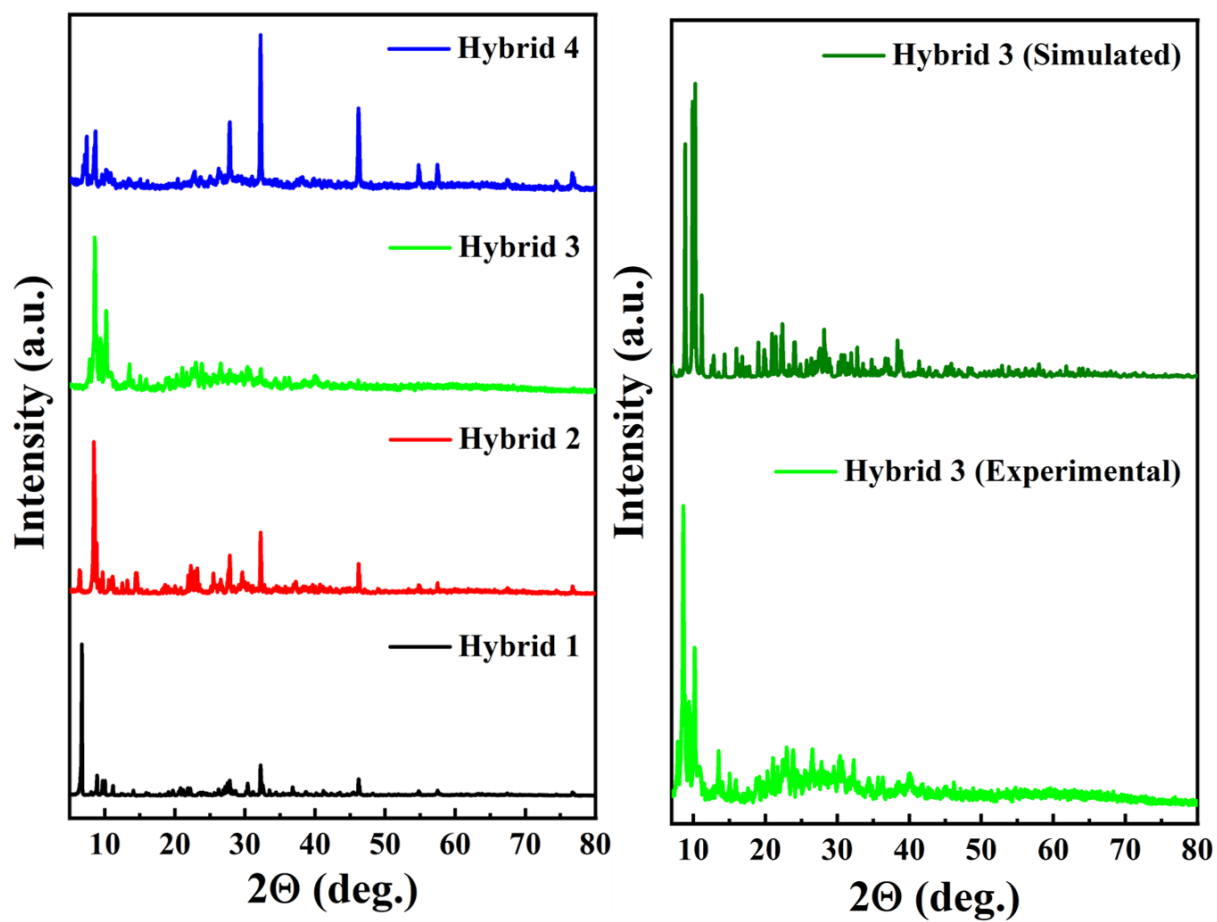

**Fig. S7** The powder X-rays diffraction pattern of (a) hybrid 1-4 and (b) simulated and observed pattern of hybrid 3.

**Table S1.** XPS atomic percentage analysis of different Mo oxidation state in hybrid **1-4**.

| <b>Sr. No.</b> | <b>Mo</b>                                 | <b>Hybrid 1</b> | <b>Hybrid 2</b> | <b>Hybrid 3</b> | <b>Hybrid 4</b> |
|----------------|-------------------------------------------|-----------------|-----------------|-----------------|-----------------|
| 1.             | <b>Mo<sup>6+</sup>3d<sub>5/2</sub>(%)</b> | 48.46           | 48.82           | 50.90           | 42.12           |
| 2.             | <b>Mo<sup>6+</sup>3d<sub>3/2</sub>(%)</b> | 34.15           | 33.83           | 34.70           | 33.91           |
| 3.             | <b>Mo<sup>5+</sup>3d<sub>5/2</sub>(%)</b> | 15.16           | 14.75           | 12.17           | 19.77           |
| 4.             | <b>Mo<sup>5+</sup>3d<sub>3/2</sub>(%)</b> | 2.24            | 2.61            | 2.23            | 4.20            |

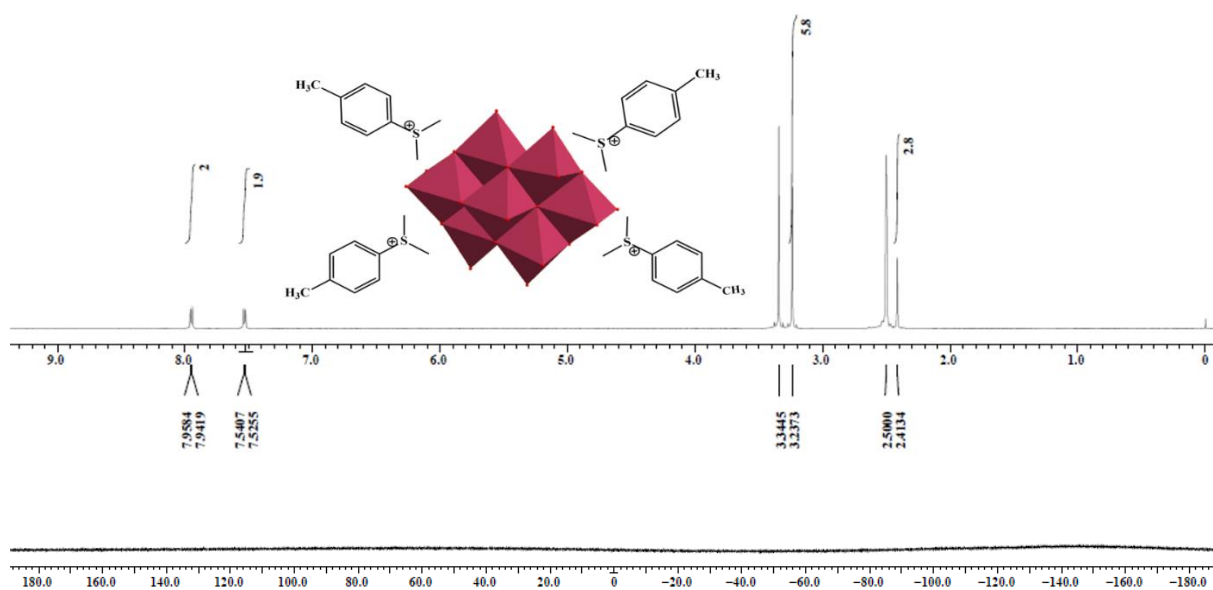

Fig. S8 <sup>1</sup>H, <sup>19</sup>F NMR spectra of hybrid 1 in DMSO-d<sub>6</sub>.

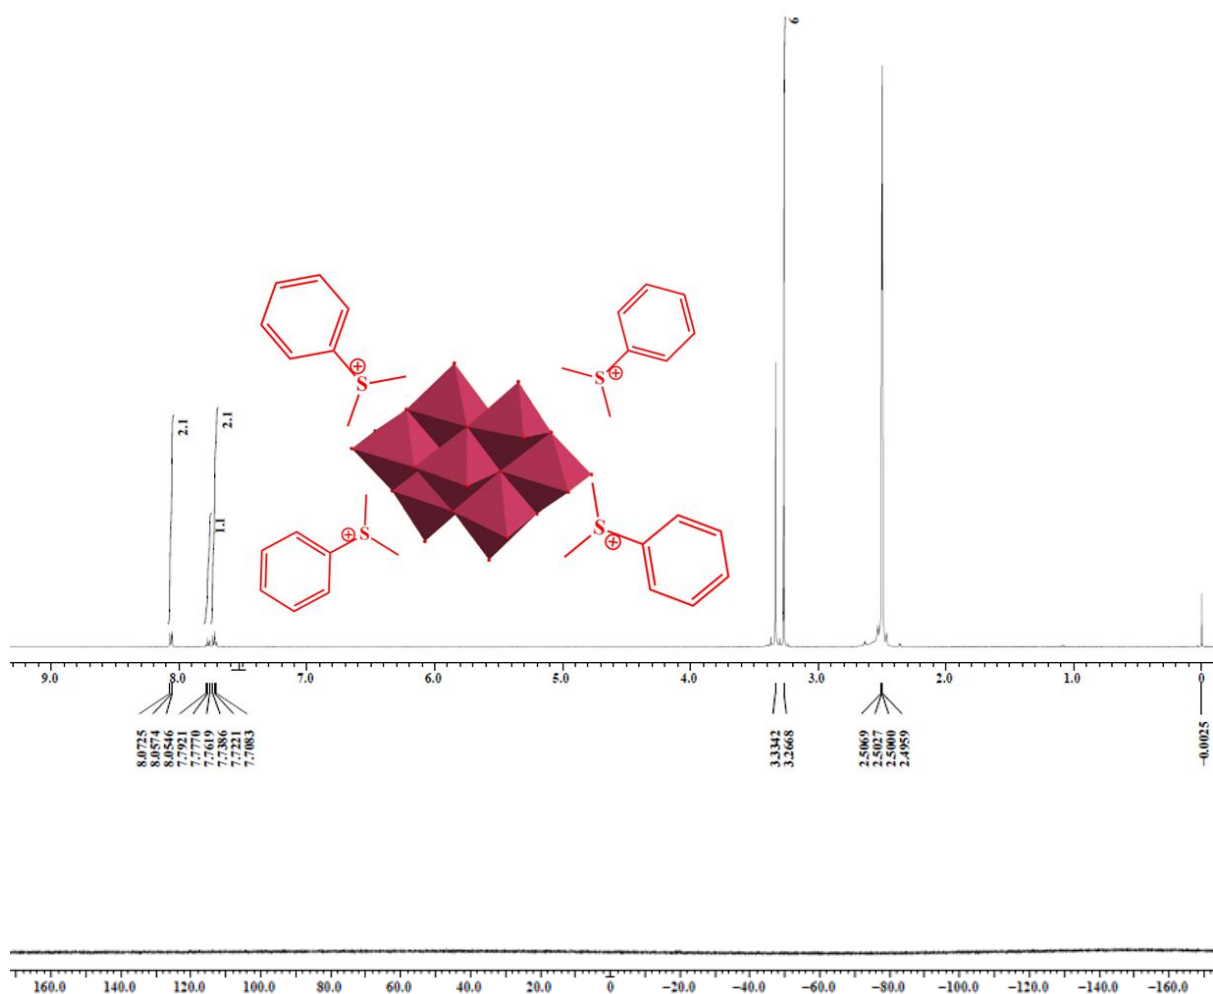

Fig. S9 <sup>1</sup>H, <sup>19</sup>F NMR spectra of hybrid 2 in DMSO-d<sub>6</sub>.

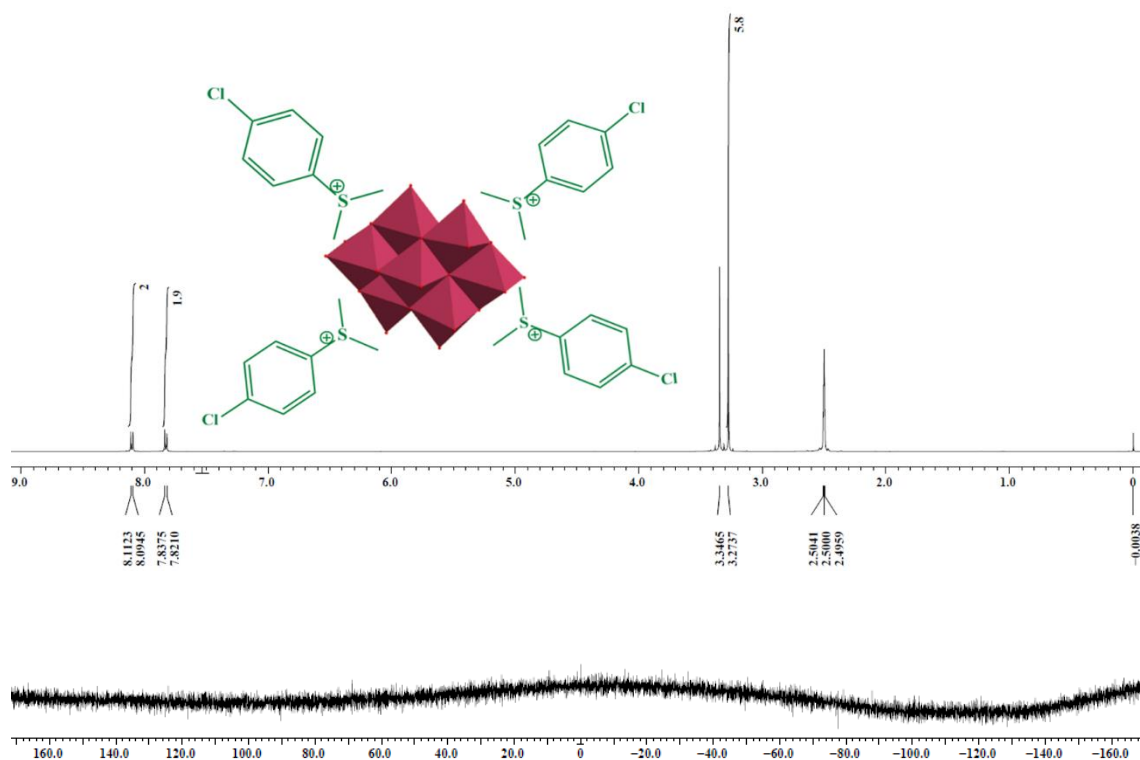

Fig. S10  $^1\text{H}$ ,  $^{19}\text{F}$  NMR spectra of hybrid 3 in DMSO- $d_6$ .

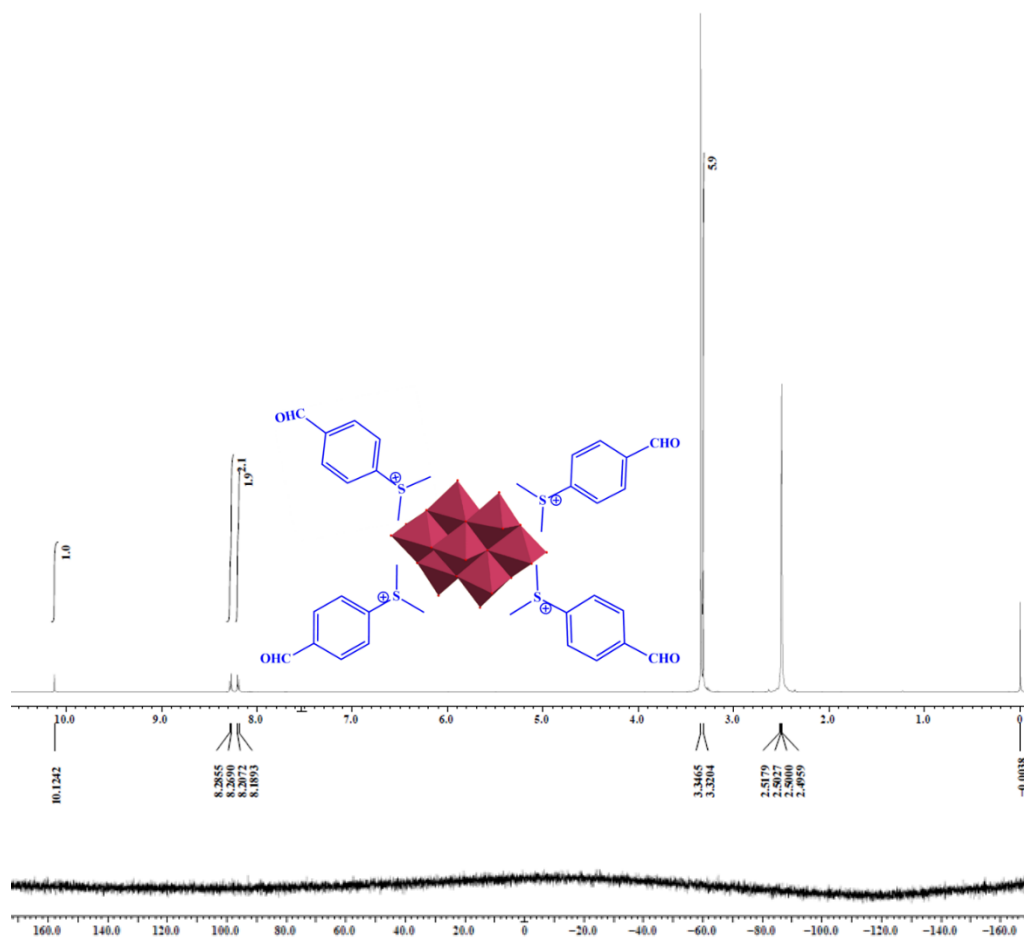

Fig. S11  $^1\text{H}$ ,  $^{19}\text{F}$  NMR spectra of hybrid 4 in DMSO- $d_6$ .

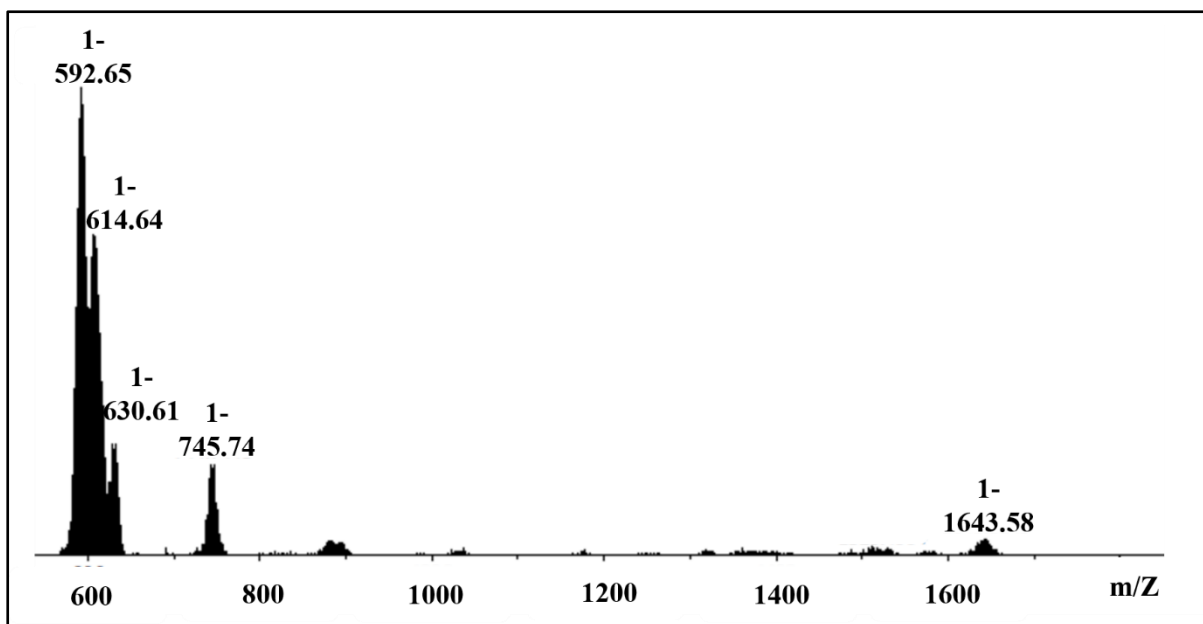

**Fig. S12** ESI – MS (negative mode) spectra of hybrid **1** recorded in acetonitrile.

**Table S2.** Detailed assignment of mass spectral data for hybrid **1**.

| Sr. No. | Ion (hybrid 1)                                                       | m/Z calculated | m/Z observed |
|---------|----------------------------------------------------------------------|----------------|--------------|
| 1.      | (H)[Mo <sub>4</sub> O <sub>13</sub> ] <sup>1-</sup>                  | 592.76         | 592.65       |
| 2.      | (Na)[Mo <sub>4</sub> O <sub>13</sub> ] <sup>1-</sup>                 | 614.74         | 614.64       |
| 3.      | (K)[Mo <sub>4</sub> O <sub>13</sub> ] <sup>1-</sup>                  | 630.85         | 630.61       |
| 4.      | (DMTS)[Mo <sub>4</sub> O <sub>13</sub> ] <sup>1-</sup>               | 745.02         | 745.74       |
| 5.      | (DMTS) <sub>3</sub> [Mo <sub>8</sub> O <sub>26</sub> ] <sup>1-</sup> | 1643.30        | 1643.58      |

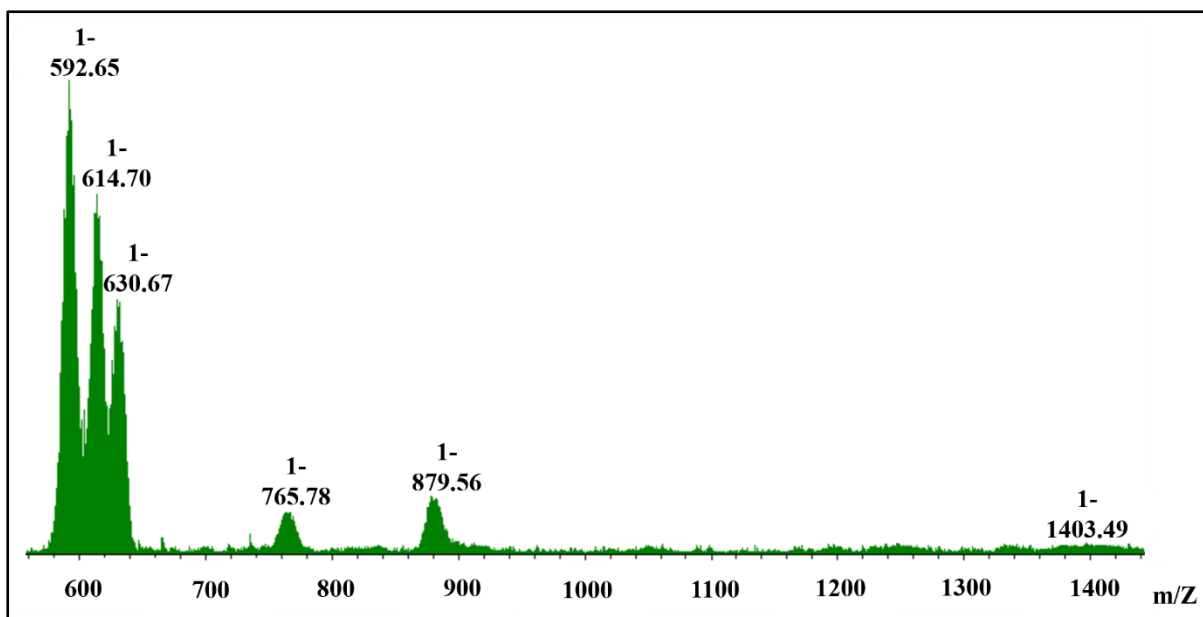

**Fig. S13** ESI – MS (negative mode) spectra of hybrid **3** recorded in acetonitrile.

**Table S3.** Detailed assignment of mass spectral data for hybrid **3**.

| Sr. No. | Ion (hybrid 3)                                                                 | m/Z calculated | m/Z observed |
|---------|--------------------------------------------------------------------------------|----------------|--------------|
| 1.      | (H)[Mo <sub>4</sub> O <sub>13</sub> ] <sup>1-</sup>                            | 592.76         | 592.65       |
| 2.      | (Na)[Mo <sub>4</sub> O <sub>13</sub> ] <sup>1-</sup>                           | 614.74         | 614.70       |
| 3.      | (K)[Mo <sub>4</sub> O <sub>13</sub> ] <sup>1-</sup>                            | 630.85         | 630.67       |
| 4.      | (CPDS)[Mo <sub>4</sub> O <sub>13</sub> ] <sup>1-</sup>                         | 765.43         | 765.78       |
| 5.      | (CPDS)(Na)[HMo <sub>4</sub> O <sub>13</sub> ] <sup>1-</sup> .5H <sub>2</sub> O | 879.51         | 879.56       |
| 6.      | (CPDS)(Na <sub>2</sub> )[Mo <sub>8</sub> O <sub>26</sub> ] <sup>1-</sup>       | 1403.17        | 1403.49      |

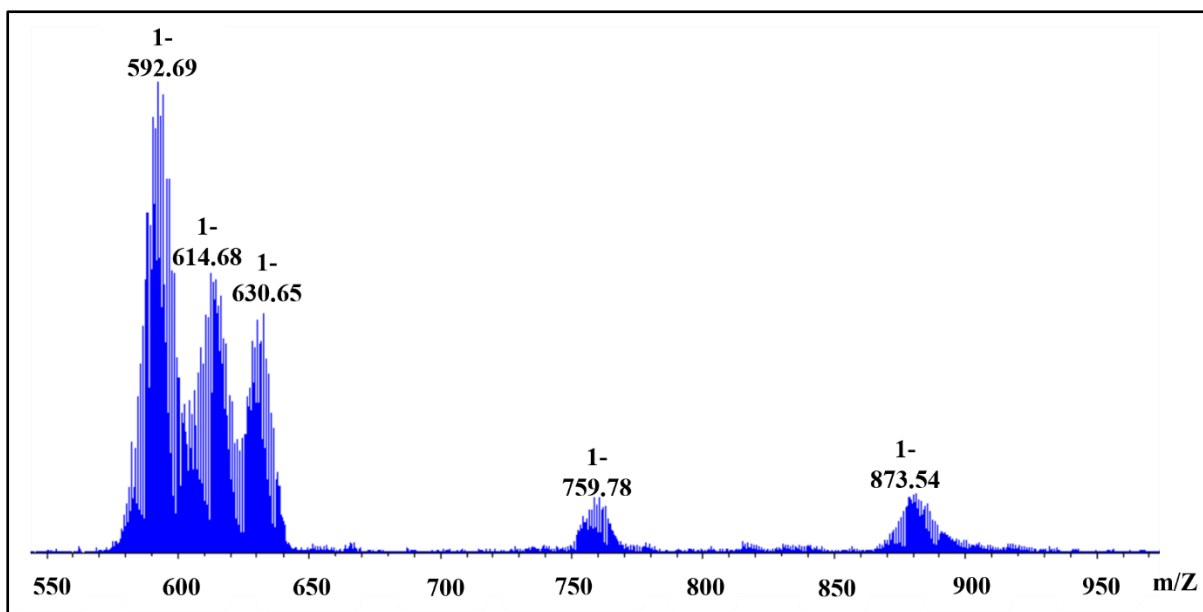

**Fig. S14** ESI – MS (negative mode) spectra of hybrid **4** recorded in acetonitrile.

**Table S4.** Detailed assignment of mass spectral data for hybrid **4**.

| Sr. No. | Ion (hybrid 4)                                                                 | m/Z calculated | m/Z observed |
|---------|--------------------------------------------------------------------------------|----------------|--------------|
| 1.      | (H)[Mo <sub>4</sub> O <sub>13</sub> ] <sup>1-</sup>                            | 592.76         | 592.69       |
| 2.      | (Na)[Mo <sub>4</sub> O <sub>13</sub> ] <sup>1-</sup>                           | 614.74         | 614.68       |
| 3.      | (K)[Mo <sub>4</sub> O <sub>13</sub> ] <sup>1-</sup>                            | 630.85         | 630.65       |
| 4.      | (FPDS)[Mo <sub>4</sub> O <sub>13</sub> ] <sup>1-</sup>                         | 759.00         | 759.78       |
| 5.      | (FPDS)(Na)[HMo <sub>4</sub> O <sub>13</sub> ] <sup>1-</sup> .5H <sub>2</sub> O | 873.07         | 873.54       |

**Table S5.** Crystallographic data and structure refinement parameters of hybrid **3**·2H<sub>2</sub>O.

|                                                   |                                                                                                |
|---------------------------------------------------|------------------------------------------------------------------------------------------------|
| Empirical formula                                 | C <sub>32</sub> H <sub>44</sub> Cl <sub>4</sub> Mo <sub>8</sub> O <sub>28</sub> S <sub>4</sub> |
| Formula weight                                    | 1914.214                                                                                       |
| Temperature/K                                     | 150.01(11)                                                                                     |
| Crystal system                                    | monoclinic                                                                                     |
| Space group                                       | P2 <sub>1</sub> /c                                                                             |
| a/Å                                               | 13.7572(4)                                                                                     |
| b/Å                                               | 19.9652(6)                                                                                     |
| c/Å                                               | 10.5884(3)                                                                                     |
| α/°                                               | 90.00                                                                                          |
| β/°                                               | 108.704(3)                                                                                     |
| γ/°                                               | 90.00                                                                                          |
| Volume/Å <sup>3</sup>                             | 2754.68(15)                                                                                    |
| Z                                                 | 2                                                                                              |
| D <sub>c</sub> (mg m <sup>-3</sup> )              | 2.308                                                                                          |
| μ/mm <sup>-1</sup>                                | 2.188                                                                                          |
| F(000)                                            | 1831.4                                                                                         |
| Crystal size/mm <sup>3</sup>                      | 0.248 × 0.179 × 0.122                                                                          |
| Radiation                                         | Mo Kα (λ = 0.71073)                                                                            |
| 2θ range for data collection/°                    | 3.74 to 56.74                                                                                  |
| Index ranges                                      | -18 ≤ h ≤ 12, -20 ≤ k ≤ 26, -9 ≤ l ≤ 13                                                        |
| Reflections collected                             | 9379                                                                                           |
| Independent reflections                           | 5955 [R <sub>int</sub> = 0.0370, R <sub>sigma</sub> = 0.0691]                                  |
| Data/restraints/parameters                        | 5955/0/350                                                                                     |
| Goodness-of-fit on F <sup>2</sup>                 | 1.041                                                                                          |
| Final R indexes [I>=2σ (I)]                       | R <sub>1</sub> = 0.0367, wR <sub>2</sub> = 0.0705                                              |
| Final R indexes (all data)                        | R <sub>1</sub> = 0.0566, wR <sub>2</sub> = 0.0894                                              |
| Largest diff. peak and hole (e. Å <sup>-3</sup> ) | 0.91/-1.06                                                                                     |



**Table S6.** Properties of rhodamine B (RhB) dye.

| Parameter          | Value                                                                               |
|--------------------|-------------------------------------------------------------------------------------|
| Name of dye        | Rhodamine B                                                                         |
| Abbreviation       | RhB                                                                                 |
| Color index number | 45170                                                                               |
| C. I. name         | Basic Violet 10                                                                     |
| Molecular formula  | $C_{28}H_{31}N_2O_3Cl$                                                              |
| Molecular weight   | 479.02 g/mol                                                                        |
| Type               | Cationic                                                                            |
| $\lambda_{max}$    | 553 nm                                                                              |
| Chemical structure | 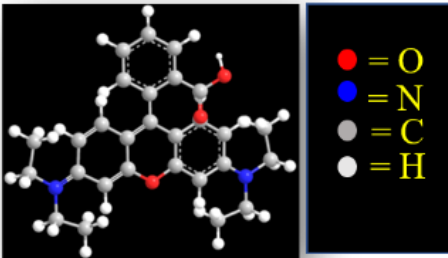 |

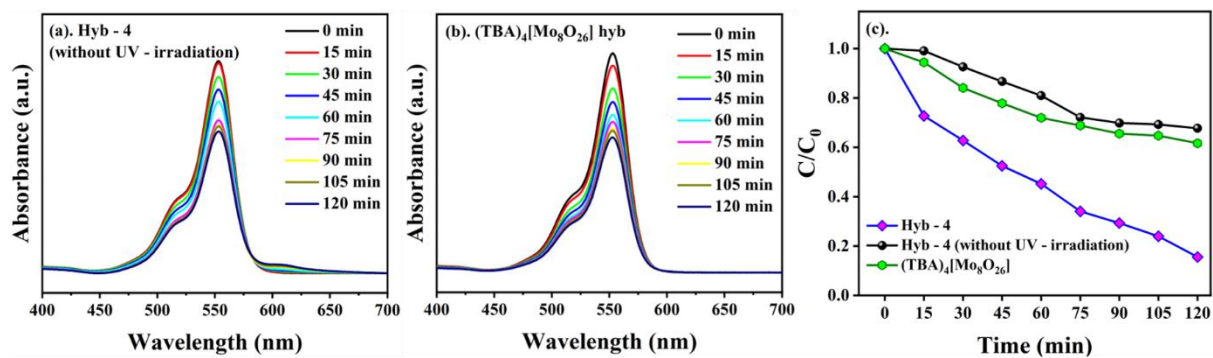

**Fig. S15** The control experiment for RhB removal with (a) hybrid **4** without irradiation of UV – light, (b) with tetrabutylammonium octamolybdate hybrid (TBA)<sub>4</sub>[Mo<sub>8</sub>O<sub>26</sub>] in the presence of UV – light and (c) the comparison of amount of RhB concentration change with hybrid **4** with or without UV – light and with (TBA)<sub>4</sub>[Mo<sub>8</sub>O<sub>26</sub>] hybrid in the presence of UV - light .

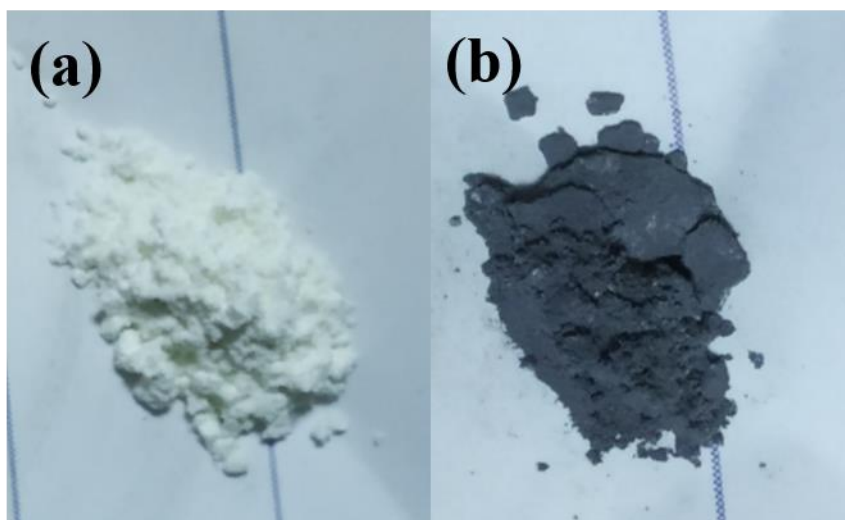

**Fig. S16** The images of hybrid **4** sample powders (a) fresh sample and (b) after keeping for 2 h in DI water under UV – irradiation.

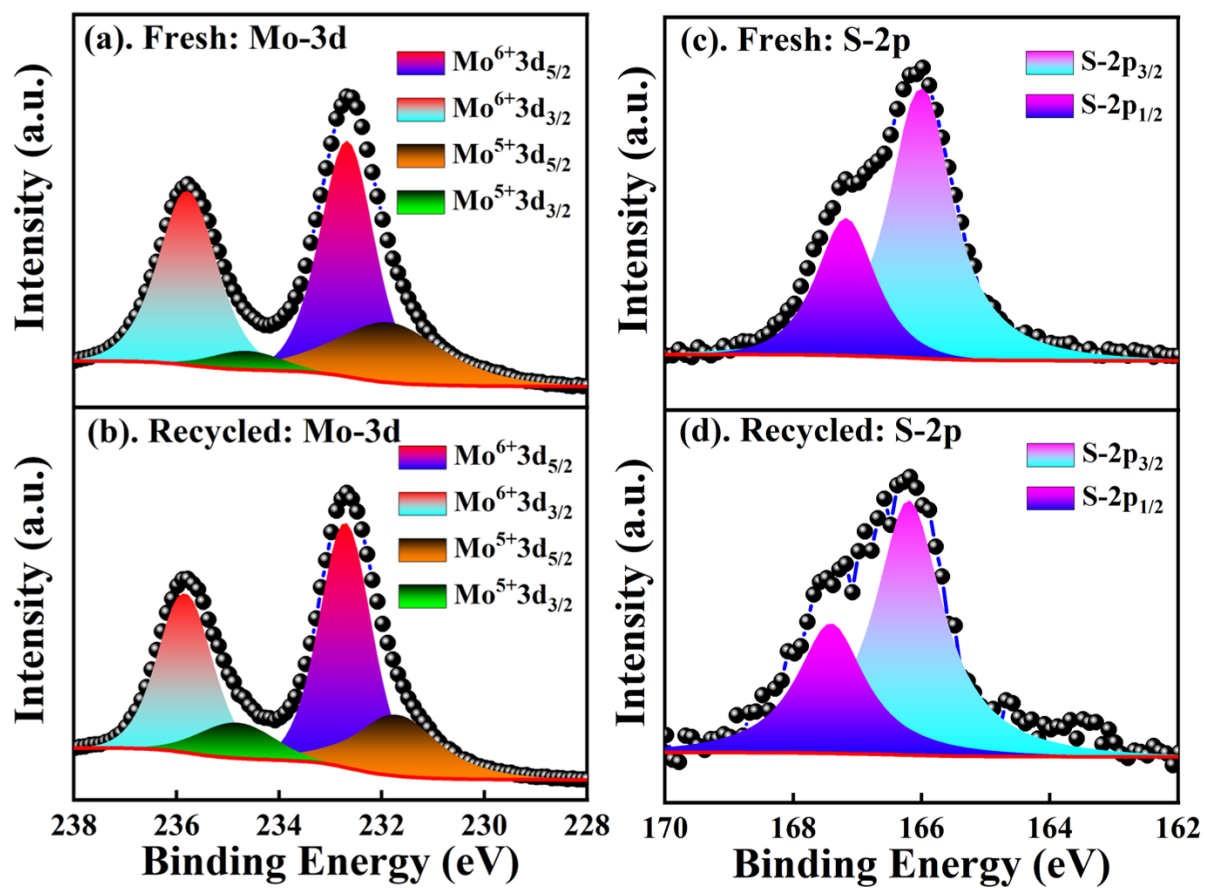

**Fig. S17** The XPS spectra of hybrid **4** (a and c) fresh catalyst and (b-d) recycled catalyst showing deconvoluted Mo and S peaks.

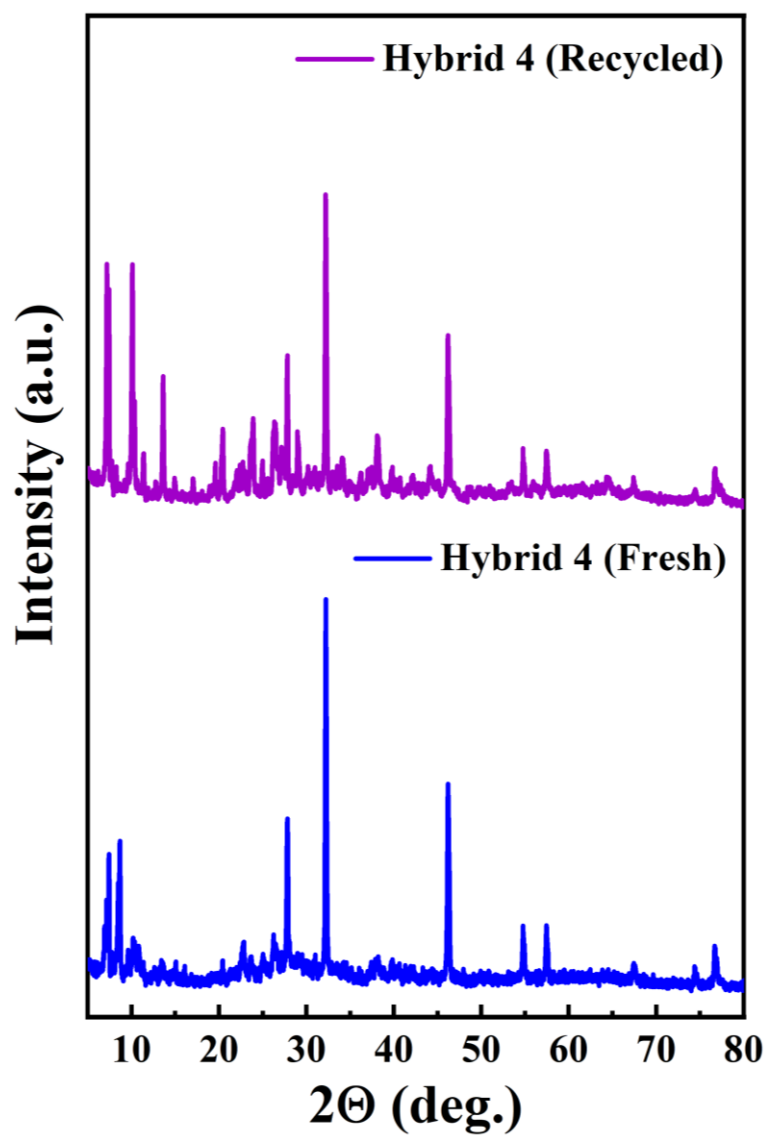

**Fig. S18** The PXRD spectra of hybrid 4, fresh and recycled catalyst.

**Table S7.** Comparison of the photocatalytic activity of hybrid **4** with several other octamolybdate base photocatalysts for RhB photodegradation.

| Sr. No. | Photocatalyst                                                                                                                                                      | Radiation source                                   | Time (min) | Total degradation (%) | Ref.      |
|---------|--------------------------------------------------------------------------------------------------------------------------------------------------------------------|----------------------------------------------------|------------|-----------------------|-----------|
| 1.      | [Co(btrp) <sub>2</sub> (H <sub>2</sub> O) <sub>2</sub> (β-Mo <sub>8</sub> O <sub>26</sub> ) <sub>0.5</sub> ] <sub>2</sub> H <sub>2</sub> O                         | Simulate sunlight – Xe lamp irradiation (5000 LUX) | 435        | 94.08                 | 1         |
| 2.      | [Co(HL) <sub>2</sub> (β-Mo <sub>8</sub> O <sub>26</sub> )]                                                                                                         | UV-irradiation – Hg lamp (125 W)                   | 180        | Very low              | 2         |
| 3.      | [Cu <sub>3</sub> (TPMA) <sub>2</sub> (1,3-ttb) <sub>2</sub> (β-Mo <sub>8</sub> O <sub>26</sub> )] <sub>2</sub> ·H <sub>2</sub> O                                   | UV irradiation Hg lamp (100 W)                     | 180        | 70                    | 3         |
| 4.      | [Cu <sup>II</sup> <sub>4</sub> (btmc)(ctcm) <sub>4</sub> (β-Mo <sub>8</sub> O <sub>26</sub> )] <sub>2</sub> ·[β-Mo <sub>8</sub> O <sub>26</sub> ]·H <sub>2</sub> O | UV irradiation                                     | 120        | 51.5                  | 4         |
| 5.      | [Cu(4-Hdppy) <sub>2</sub> (β-Mo <sub>8</sub> O <sub>26</sub> )(H <sub>2</sub> O) <sub>2</sub> ] <sub>2</sub> ·4H <sub>2</sub> O                                    | UV light irradiation – Hg lamp (125 W)             | 180        | 59.4                  | 5         |
| 6.      | (FPDS) <sub>4</sub> [Mo <sub>8</sub> O <sub>26</sub> ] – Hybrid 4                                                                                                  | UV irradiation – Hg lamp (8 W)                     | 120        | 84.4                  | This work |

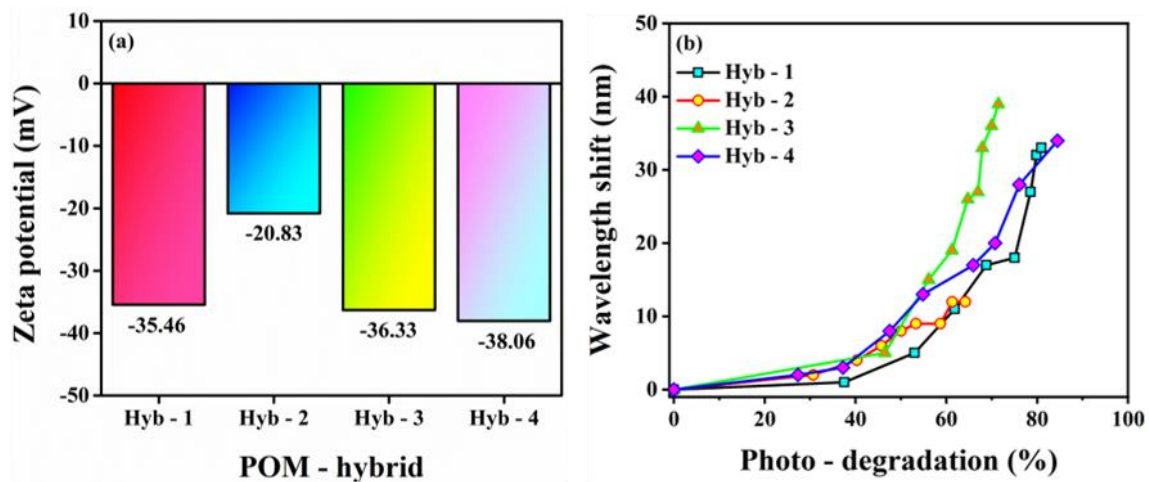

**Fig. S19** (a) Zeta potential of different hybrids at 4.65 pH and (b) maximum absorption wavelength shift of RhB as a function of degradation percentage with different POM – hybrids.

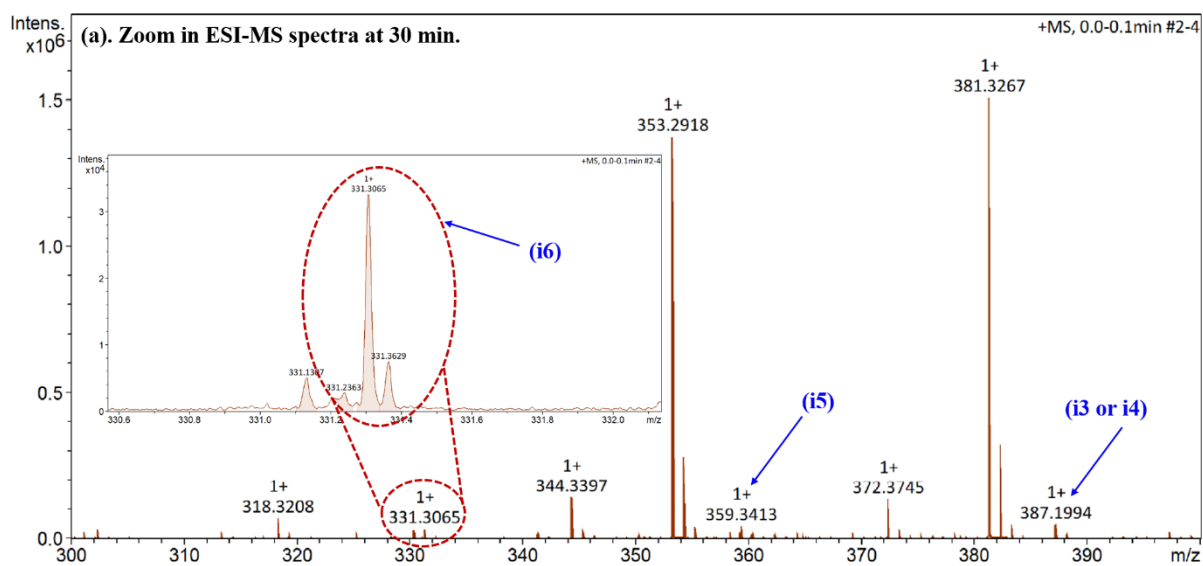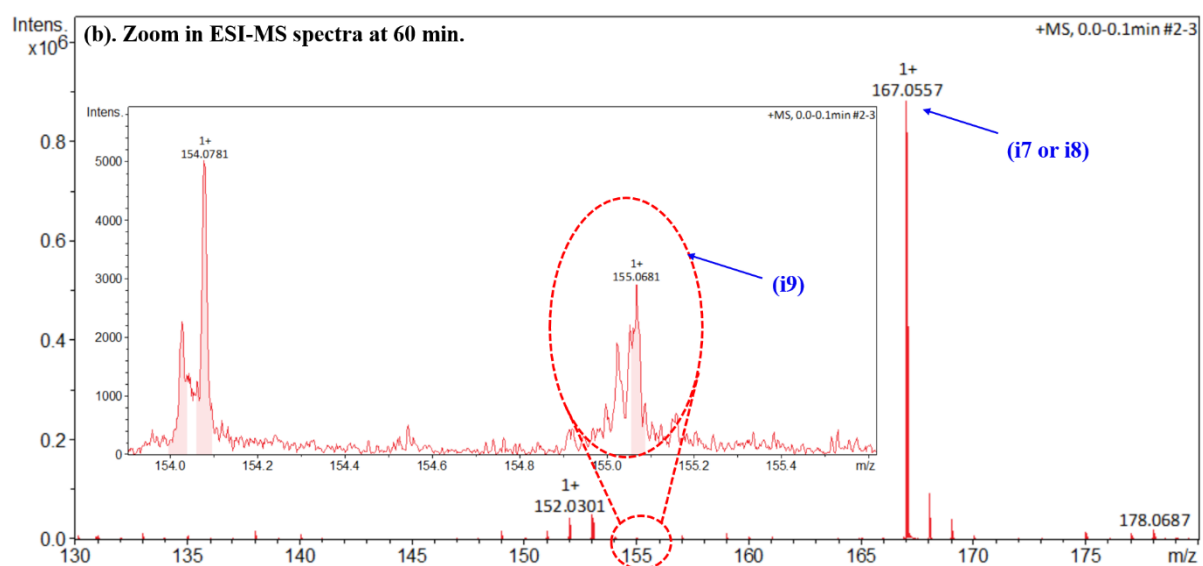

**Fig. S20** Zoom in ESI – MS spectra (positive ion mode) of photodegraded RhB dye at (a) 30 min showing the presence of intermediate i3 or i4, i-5, i6 and (b) 60 min showing the presence of intermediate i7 or i8 and i9.



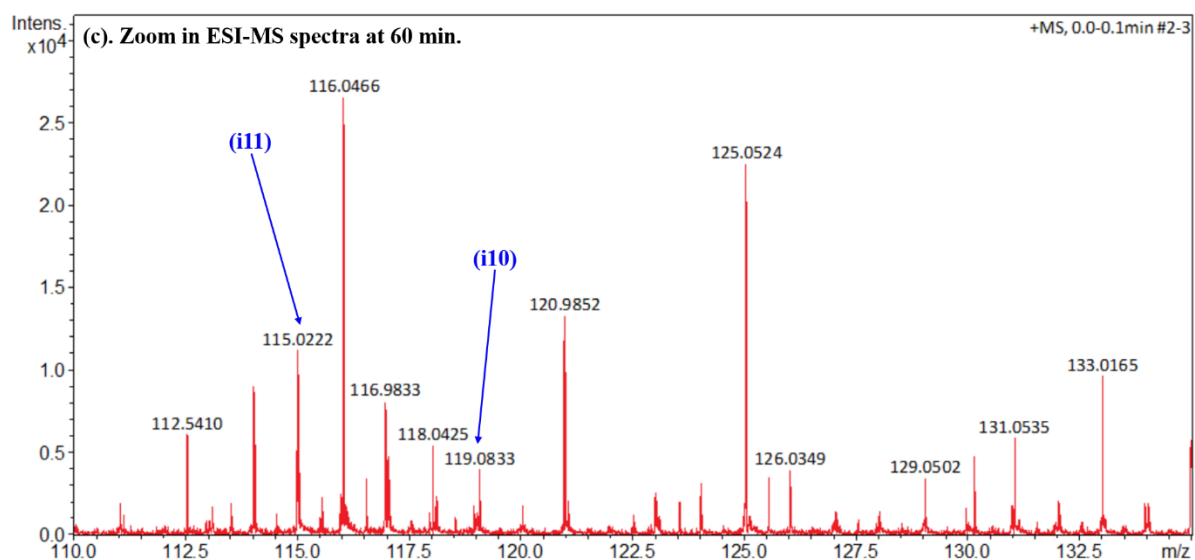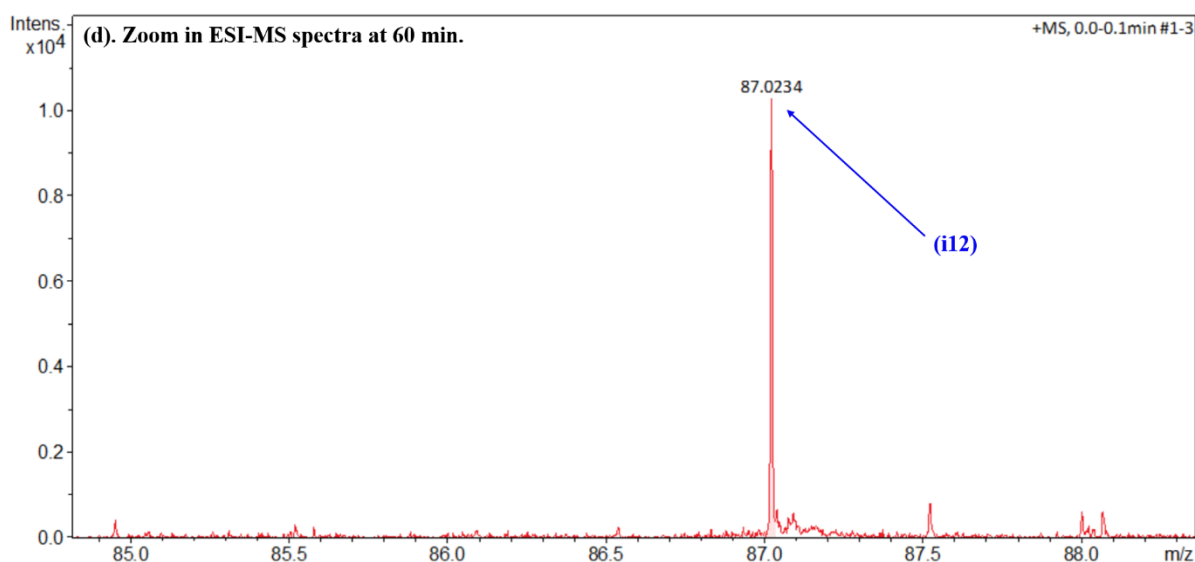

**Fig. S21** Zoom in ESI – MS spectra (positive ion mode) of photodegraded RhB dye at 60 min showing the presence of intermediate (c) i10, i11 and (d) i12.



**Table S8.** Various intermediates involved in RhB dye photodegradation their chemical composition, expected and observed m/Z value.

| Sr. No. | Intermediate | Chemical formula          | Expected mass (m/Z) | Observed mass (m/Z) |
|---------|--------------|---------------------------|---------------------|---------------------|
| 1.      | (i1)         | $[C_{28}H_{31}N_2O_3]^+$  | 443.233             | 443.281             |
| 2.      | (i2)         | $[C_{26}H_{27}ON_2O_3]^+$ | 415.202             | 415.237             |
| 3.      | (i3) or (i4) | $[C_{24}H_{23}N_2O_3]^+$  | 387.170             | 387.199             |
| 4.      | (i5)         | $[C_{22}H_{19}N_2O_3]^+$  | 359.139             | 359.341             |
| 5.      | (i6)         | $[C_{20}H_{15}N_2O_3]^+$  | 331.108             | 331.306             |
| 6.      | (i7 or i8)   | $[C_8H_6O_4H]^+$          | 167.027             | 167.055             |
| 7.      | (i9)         | $[C_7H_6O_4H]^+$          | 155.027             | 155.068             |
| 8.      | (i10)        | $[C_4H_6O_4H]^+$          | 119.100             | 119.083             |
| 9.      | (i11)        | $[C_4H_2O_4H]^+$          | 115.060             | 115.022             |
| 10.     | (i12)        | $[C_4H_6O_2H]^+$          | 87.100              | 87.023              |

## References

1. J. Chi, M. Fan, Z. Su, X. Li, J. Sun, C. Zhou and X. Hu, Octamolybdate-based hybrid constructed by flexible bis-triazole ligands: synthesis, photocatalytic and electrochemical properties, *New J. Chem.*, 2020, **44**, 13524-13528.
2. L. Li, X. Wang, N. Xu, Z. Chang, G. Liu, H. Lin and X. Wang, Four octamolybdate complexes constructed from a quinoline–imidazole–monoamide ligand: structures and electrochemical, photocatalytic and magnetic properties, *CrystEngComm.*, 2020, **22**, 8322-8329.
3. H. Guo, C. Gong, X. Zeng, H. Xu, Q. Zeng, J. Zhang, Z. Zhong and J. Xie, Isopolymolybdate-based inorganic–organic hybrid compounds constructed by multidentate N-donor ligands: syntheses, structures and properties, *Dalton Trans.*, 2019, **48**, 5541-5550.
4. C. Wang, J. Ying, H.-c. Mou, A.-x. Tian and X.-l. Wang, Multi-functional photoelectric sensors based on a series of isopolymolybdate-based compounds for detecting different ions, *Inorg. Chem. Front.*, 2020, **7**, 3882-3894.
5. X. Wang, J. Sun, H. Lin, Z. Chang, X. Wang and G. Liu, A series of Anderson-type polyoxometalate-based metal–organic complexes: Their pH-dependent electrochemical behaviour, and as electrocatalysts and photocatalysts, *Dalton Trans.*, 2016, **45**, 12465-12478.
